# Supplementary material for: The Roots of Rye (Secale cereale L.) Are Capable of Synthesizing Benzoxazinoids
Source: MDPI journal article supplement (doi:10.3390/ijms22094656), 2021-04-28
Supplement: s1 [file s1]

**The roots of rye (*Secale cereale* L.) are capable of synthesizing benzoxazinoids**

Monika Rakoczy-Trojanowska<sup>1,\*</sup>, Bartosz M. Szabała<sup>1</sup>, Elżbieta Różańska<sup>2</sup>, Mariusz Kowalczyk<sup>3</sup>,  
Wojciech Burza<sup>1</sup>, Beata Bakera<sup>1</sup>, Magdalena Świącicka<sup>1,2</sup>

<sup>1</sup> Department of Plant Genetics, Breeding and Biotechnology, Institute of Biology, Warsaw University of Life Sciences (SGGW), Nowoursynowska 166 St., 02-787 Warsaw, Poland

<sup>2</sup> Department of Botany, Institute of Biology, Warsaw University of Life Sciences (SGGW), Nowoursynowska 166 St., 02-787 Warsaw, Poland

<sup>3</sup> Department of Biochemistry and Crop Quality, Institute of Soil Science and Plant Cultivation - State Research Institute, Czartoryskich 8 St., 24-100 Puławy, Poland

\*corresponding author: [monika\\_rakoczy\\_trojanowska@sggw.edu.pl](mailto:monika_rakoczy_trojanowska@sggw.edu.pl) tel. +48-225932150

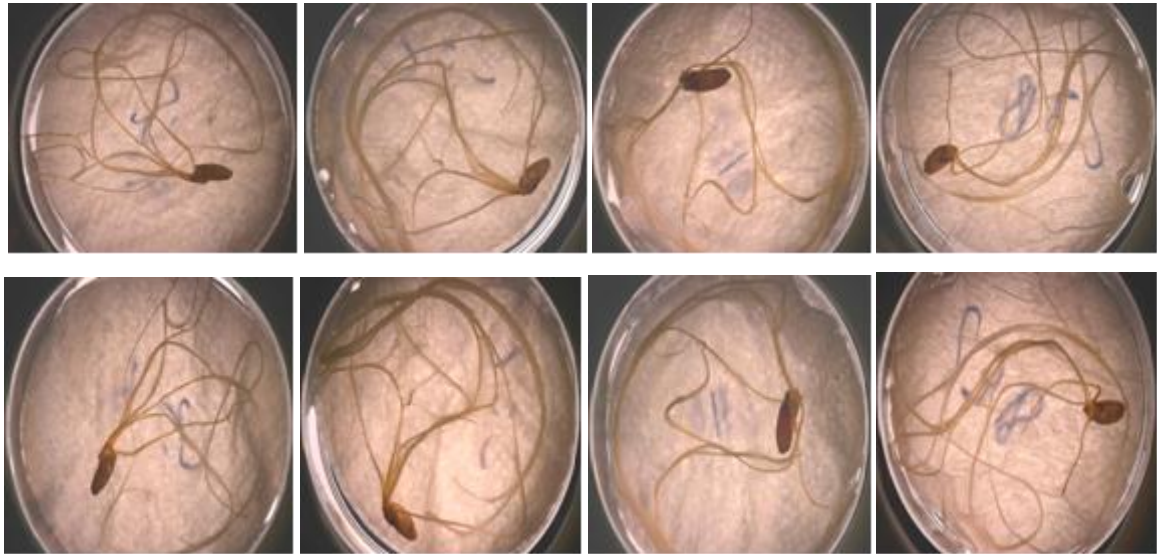

Figure S1. Twelve-day-old roots developed from seeds deprived of coleoptile of rye inbred line L318.

Table S1. Relative transcript levels of *ScBx1* and *ScIgl* in rye RDC, RIV, R2W, and L2W.

| Analyzed organ/organoid | Genes           |                 |
|-------------------------|-----------------|-----------------|
|                         | <i>ScBx1</i>    | <i>ScIgl</i>    |
| RDC                     | 0.0014 (0.0002) | 0.0224 (0.0100) |
| RIV                     | 0,0002 (0.0000) | nd (-)          |
| KI R2W                  | 0.0028 (0.0004) | 0.0090 (0.0010) |
| KII L2W                 | 0.0697 (0.0067) | 0.0020 (0.0010) |

RDC - roots developed from seeds deprived of the coleoptile at 2 days after sowing

RIV - roots developed *in vitro*

KI R2W - control reference organ: roots from 2-week-old seedlings

KII L2W - control reference organ: leaves from 2-week-old seedlings

nd – not detected

Values in brackets are standard errors.

The same methodology was used to analyse *ScIgl* and *ScBx1* transcript levels (described in the main text). The sequences of primers used in PCR were as follows:

F: AACACCAGCTACACCATCAGAG

R: GTGGGTTTACAGTCGCCCTA

Table S2. Contents of six benzoxazinoids in RDC, RIV, R2W, and L2W of rye inbred line L318.

| Analyzed<br>organ/organoid | BX [ $\mu\text{g}/\text{mg d.m.}$ ] |                  |                  |                  |                  |                  |
|----------------------------|-------------------------------------|------------------|------------------|------------------|------------------|------------------|
|                            | HBOA                                | GDIBOA           | DIBOA            | GDIMBOA          | DIMBOA           | MBOA             |
| RDC                        | 0.028<br>(0.001)                    | 0.070<br>(0.000) | 0.248<br>(0.003) | 0.772<br>(0.001) | 1.194<br>(0.008) | 0.410<br>(0.021) |
| RIV                        | 0.004<br>(0.000)                    | 0.010<br>(0.001) | 0.003<br>(0.000) | nd<br>-          | 0.010<br>(0.001) | 0.001<br>(0.000) |
| KI R2W                     | 0.018<br>(0.000)                    | 0.318<br>(0.013) | 0.114<br>(0.006) | 8.073<br>(0.000) | 0.536<br>(0.013) | 0.427<br>(0.013) |
| KII L2W                    | 0.202<br>(0.090)                    | 2.507<br>(0.726) | 4.475<br>(1.405) | 0.230<br>(0.128) | 0.013<br>(0.010) | 0.044<br>(0.015) |

RDC - roots developed from seeds deprived of the coleoptile at 2 days after sowing

RIV - roots developed *in vitro*

KI R2W - control reference organ: roots from 2-week-old seedlings

KII L2W - control reference organ: leaves from 2-week-old seedlings

nd – not detected

Values in brackets are standard errors.

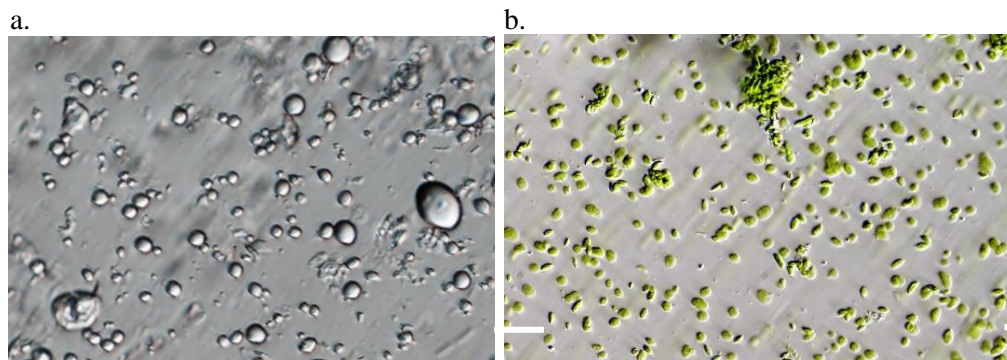

Figure S2. Plastids isolated from roots developed from (a) seeds deprived of coleoptile at 2 days after sowing and (b) leaves of 2-week-old seedlings of rye inbred line L318. Scale bars = 50 µm.

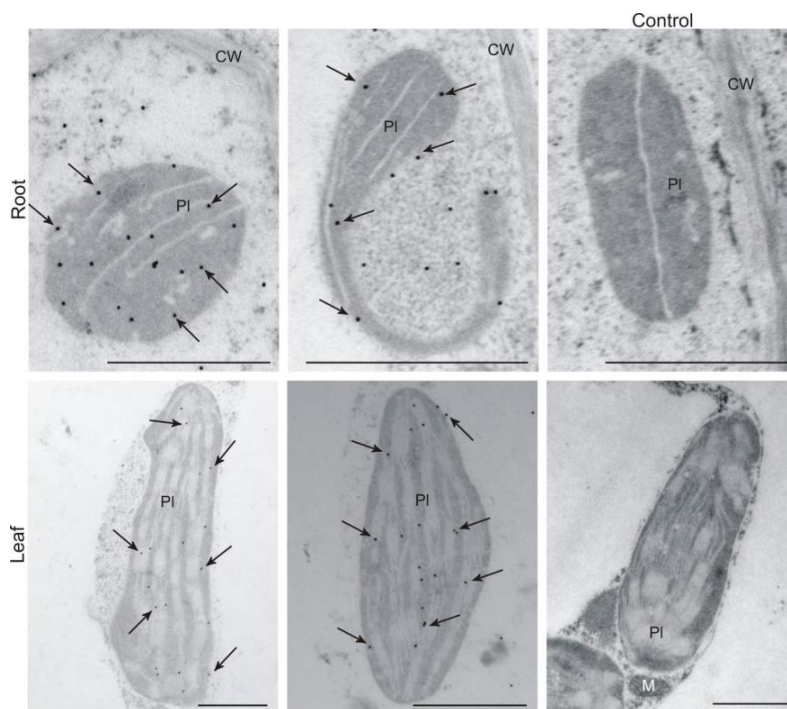

Figure S3. Localisation of indole-3-glycerol phosphate lyase by immunogold labelling and transmission microscopy in roots (R2W) and leaves (L2W) of 2-week-old seedlings of rye inbred line L318. Abbreviations: CW- cell wall, M- mitochondrion, PI- plastid. Scale bars = 1 µm.
